# Supplementary material for: Transcriptomic and Proteomic Characterizations of the Molecular Response to Blue Light and Salicylic Acid in Haematococcus pluvialis
Source: MDPI journal article supplement (doi:10.3390/md20010001), 2021-12-21
Supplement: s1 [file s1]

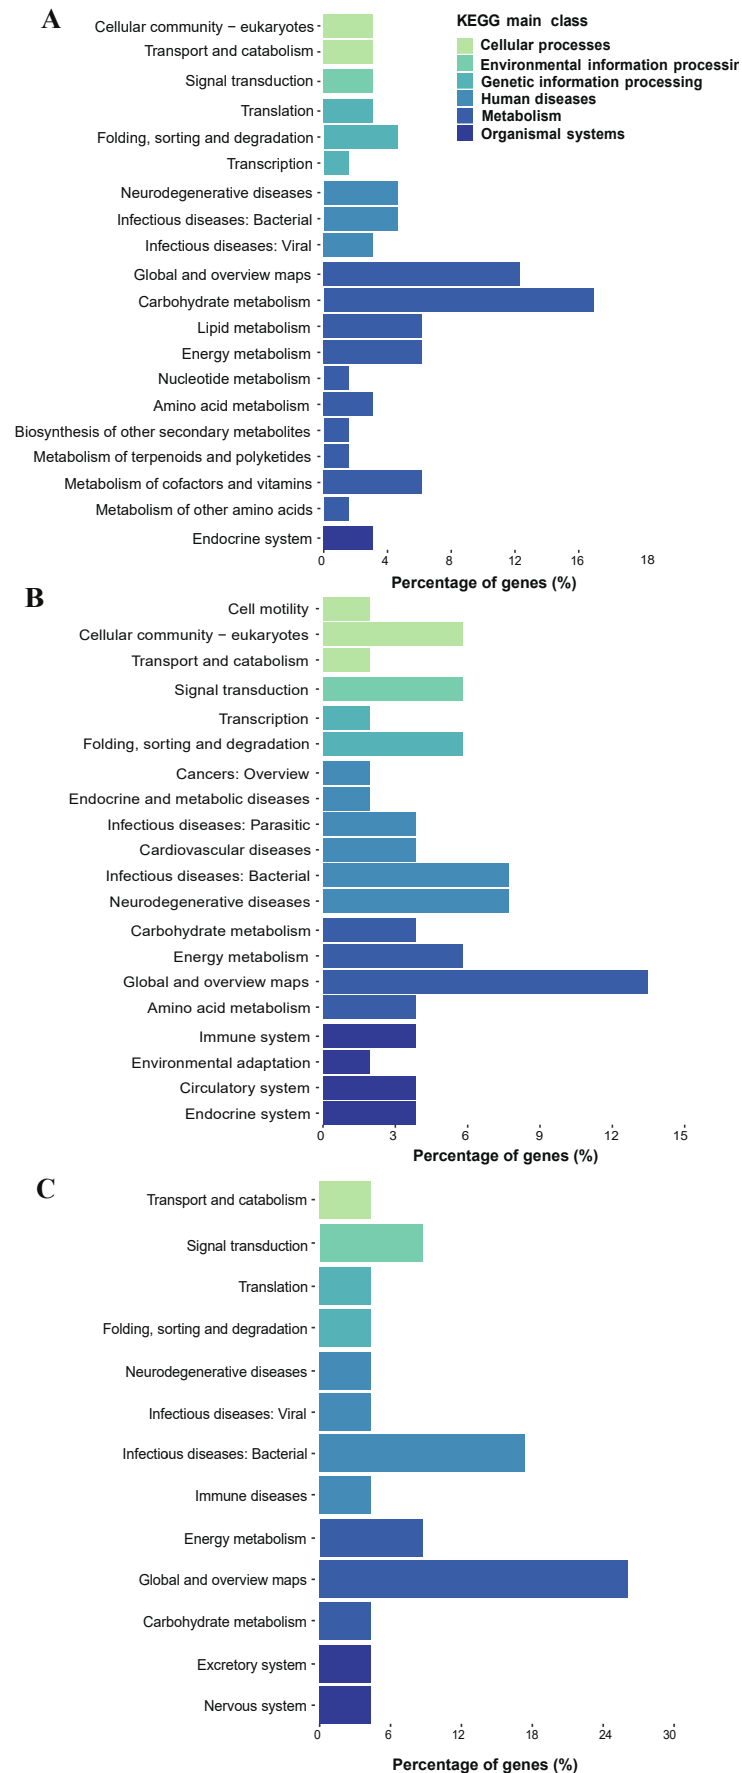

**Figure S4.** Enriched KEGG metabolic pathways based on the unigenes with significant changes revealed in the pairwise comparisons of B02 vs. W02 (A), B07 vs. W07 (B), and B257 vs. B07 (C) in *Haematococcus pluvialis*.
