# Supplementary material for: Transcriptomic and Proteomic Characterizations of the Molecular Response to Blue Light and Salicylic Acid in Haematococcus pluvialis
Source: MDPI journal article supplement (doi:10.3390/md20010001), 2021-12-21
Supplement: s1 [file s1]

**Table S1.** Summary of RNA-seq data in *Haematococcus pluvialis* based on three groups of samples on day 0, day 2, and day 7 after the treatments of white light, blue light, and salicylic acid (SA). “N” indicates sampling on day 0 (white light). B02 and B07 represent samples treated with blue light irradiation for 2 and 7 days without salicylic acid (SA), respectively. W02 and W07 represent samples treated with white light irradiation for 2 and 7 days without SA, respectively. B252 and B257 represent samples treated with blue light irradiation for 2 and 7 days with the addition of SA, respectively. Each treatment was repeated with three replicates indicated as “\_1,” “\_2,” and “\_3” in the sample names.

| Sample | Raw Reads  | Clean Reads | Valid% | GC%   |
|--------|------------|-------------|--------|-------|
| Day 0  |            |             |        |       |
| N_1    | 53,024,556 | 50,073,484  | 94.43  | 58.09 |
| N_2    | 52,384,966 | 47,745,982  | 91.14  | 58.00 |
| N_3    | 54,712,592 | 48,657,044  | 88.93  | 58.01 |
| Day 2  |            |             |        |       |
| W02_1  | 39,202,360 | 34,480,996  | 87.96  | 57.35 |
| W02_2  | 50,345,258 | 46,062,990  | 91.49  | 57.29 |
| W02_3  | 46,365,492 | 42,373,204  | 91.39  | 55.69 |
| B252_1 | 56,545,752 | 48,834,448  | 86.36  | 57.68 |
| B252_2 | 47,661,116 | 41,786,066  | 87.67  | 56.75 |
| B252_3 | 45,954,788 | 34,585,052  | 75.26  | 56.32 |
| B02_1  | 55,671,946 | 45,876,098  | 82.40  | 56.94 |
| B02_2  | 57,264,362 | 49,572,178  | 86.57  | 57.50 |
| B02_3  | 57,085,504 | 49,425,904  | 86.58  | 57.56 |
| Day 7  |            |             |        |       |
| W07_1  | 45,120,414 | 40,448,046  | 89.64  | 57.96 |
| W07_2  | 36,279,402 | 32,475,318  | 89.51  | 57.63 |
| W07_3  | 46,378,030 | 39,765,614  | 85.74  | 57.45 |
| B257_1 | 45,965,390 | 36,904,362  | 80.29  | 55.05 |
| B257_2 | 45,701,202 | 40,101,010  | 87.75  | 56.57 |
| B257_3 | 47,725,610 | 42,774,912  | 89.63  | 57.48 |
| B07_1  | 33,303,774 | 28,587,214  | 85.84  | 56.19 |
| B07_2  | 41,308,634 | 34,108,042  | 82.57  | 55.60 |
| B07_3  | 41,476,528 | 37,653,068  | 90.78  | 56.79 |
