# Supplementary figures and images for: Transcriptomic and Proteomic Characterizations of the Molecular Response to Blue Light and Salicylic Acid in Haematococcus pluvialis
Source: MDPI journal article supplement (doi:10.3390/md20010001), 2021-12-21

## Species Distribution

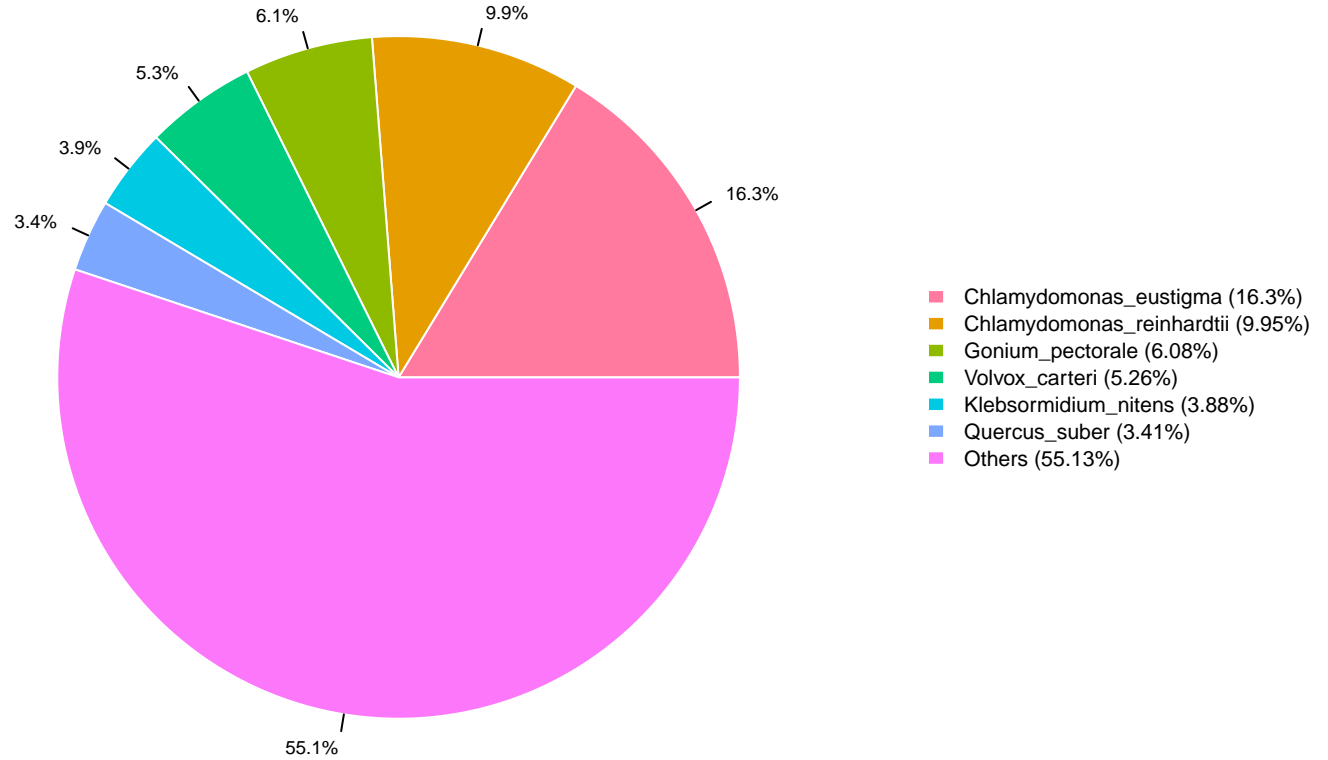

Supplement: s1 [file s1]

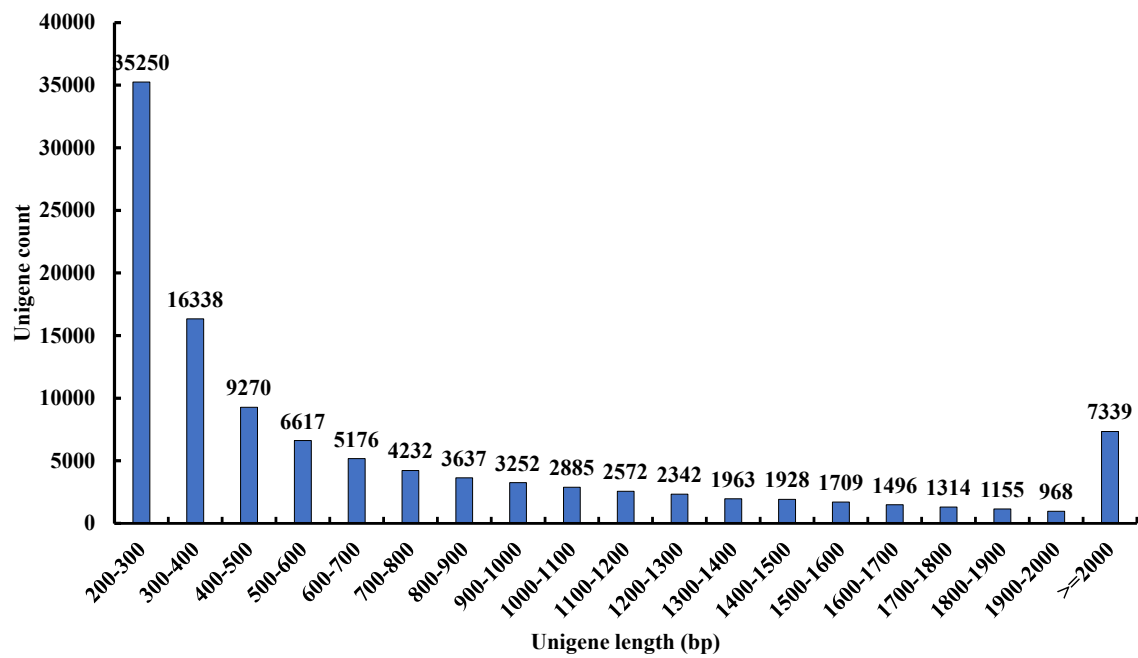

**Figure 1.** The length distribution of unigenes of *Haematococcus pluvialis*.

Supplement: s1 [file s1]
